# Supplementary material
Source: HighWire-hosted journal article supplement (https://gut.bmj.com/content/71/1/25)
Supplement: inline-supplementary-material-4 [file inline-supplementary-material-4.pdf]

Supplementary table 3. Etiology of gastroparesis and related clinical characteristics

| G-POEM (n=80)                                                   | N (%)      |
|-----------------------------------------------------------------|------------|
| <b>Idiopathic n=33 (41.3%)</b>                                  |            |
| Acute viral illness prior development of gastroparesis symptoms | 10 (31.3%) |
| Concomitant psychiatric disease                                 | 20 (60.6%) |
| Depression                                                      | 1 (3%)     |
| Anxiety                                                         | 2 (6.1%)   |
| Depression plus anxiety                                         | 6 (18.2%)  |
| Bipolar disorder                                                | 4 (12.1%)  |
| Autoimmune disorders                                            | 1 (3%)     |
| Medication use                                                  | 6 (18%)    |
| Anticholinergic                                                 | 5 (15.2%)  |
| TCA                                                             | 1 (3%)     |
| <b>Post-surgical n=28 (35%)</b>                                 |            |
| Nissen fundoplication                                           | 18 (64.4%) |
| Dor fundoplication                                              | 1 (3.5%)   |
| Esophagotomy                                                    | 9 (32.1%)  |
| <b>Diabetes Mellitus n=19 (23.8%)</b>                           |            |
| Type 1 DM                                                       | 7 (36.8%)  |
| <b>Treatment of DM at the time of G-POEM</b>                    |            |
| Insulin only                                                    | 8 (42.1%)  |
| Insulin + oral agent                                            | 5 (26.3%)  |
| Oral agent only                                                 | 5 (26.3%)  |
| Pancreas transplant                                             | 1 (5.3%)   |
| Prescribed opiate use*                                          | 7 (36.8%)  |
| Cannabinoid use                                                 | 2 (10.5%)  |

\*Opium abuse at the time of G-POEM was an exclusion criterion of the study.

G-POEM, Gastric per-oral endoscopic myotomy.
